# Demographic tradeoffs predict tropical forest dynamics

Nadja Rüger<sup>1,2,\*</sup>, Richard Condit<sup>3,4</sup>, Daisy H. Dent<sup>2,5</sup>, Saara J. DeWalt<sup>6</sup>, Stephen P. Hubbell<sup>2,7</sup>, Jeremy W. Lichstein<sup>8</sup>, Omar R. Lopez<sup>2,9</sup>, Christian Wirth<sup>1,10,11</sup>, Caroline E. Farrior<sup>12</sup>

5 <sup>1</sup> German Centre for Integrative Biodiversity Research (iDiv) Halle-Jena-Leipzig, Deutscher Platz 5e, 04103 Leipzig, Germany.

<sup>2</sup> Smithsonian Tropical Research Institute, Apartado 0843-03092, Balboa, Ancón, Panama.

<sup>3</sup> Field Museum of Natural History, 1400 S. Lake Shore Dr., Chicago, 60605, IL, USA.

<sup>4</sup> Morton Arboretum, 4100 Illinois Rte. 53, Lisle, 60532, IL, USA.

10 <sup>5</sup> Biological and Environmental Sciences, University of Stirling, Stirling, FK9 4LA. UK.

<sup>6</sup> Department of Biological Sciences, Clemson University, Clemson, SC 29634, USA.

<sup>7</sup> Department of Ecology and Evolutionary Biology, University of California, Los Angeles, CA 90095, USA.

<sup>8</sup> Department of Biology, University of Florida, Gainesville, FL 32611, USA.

15 <sup>9</sup> Instituto de Investigaciones Científicas y Servicios de Alta Tecnología (INDICASAT), Edificio 209, Clayton, Panama.

<sup>10</sup> Systematic Botany and Functional Biodiversity, Institute of Biology, University of Leipzig, Johannisallee 21-23, 04103 Leipzig, Germany.

<sup>11</sup> Max-Planck-Institute for Biogeochemistry, Hans-Knöll Str. 10, 07745 Jena, Germany.

20 <sup>12</sup> Department of Integrative Biology, University of Texas at Austin, Austin, TX 78712, USA.

\*Correspondence to: [nadja.rueger@idiv.de](mailto:nadja.rueger@idiv.de)

## Abstract

25 Assessing vegetation feedbacks with the climate system and planning sustainable management in tropical forests requires efficient, yet accurate, predictions of the joint dynamics of hundreds of tree species. With increasing information on tropical tree life-histories, our predictive understanding is no longer limited by species data, but by the ability of existing models to make use of it. Using a demographic forest model, we show that the basal area and compositional changes during forest succession in a Neotropical forest can be accurately predicted by  
30 representing tropical tree diversity (hundreds of species) with only five functional groups spanning two essential tradeoffs – the growth–survival and stature–recruitment tradeoffs. This data-driven modeling framework substantially improves our ability to predict consequences of anthropogenic impacts on tropical forests.

## 35 Main Text

Tropical forests are highly dynamic. Only about 50% of the world's tropical forests are undisturbed old-growth forests (1). The remaining half comprises forests regenerating after previous land use, timber or fuelwood extraction, or natural disturbances. Even unmanaged old-growth forests are a dynamic mosaic of patches recovering from single- or multiple treefall gaps (2). Thus, understanding how forest structure and composition of the diverse tree flora change during recovery from disturbance is fundamental to predict carbon stocks and fluxes and vegetation feedbacks to the climate system (3), as well as to plan sustainable forest management (4). Despite the importance of regenerating tropical forests for the global carbon cycle and timber industry, our mechanistic understanding and ability to forecast compositional changes of these forests remains severely limited (5).

So far, forest succession has been viewed mostly through a one-dimensional lens distinguishing early-, mid-, and late-successional species (5, 6). This classification corresponds to the well-known fast–slow life-history continuum or the growth–survival tradeoff (7). ‘Fast’ species grow quickly but survive poorly and dominate early successional stages, while ‘slow’ species grow slow but survive well and reach dominance in later successional stages. In addition, several studies suggest that tropical tree communities are also structured along a second major tradeoff axis that is orthogonal to the growth–survival tradeoff: the stature–recruitment tradeoff (8, 9). The stature–recruitment tradeoff distinguishes long-lived pioneers (LLPs) from short-lived breeders (SLBs). LLPs grow fast and live long and hence attain a large stature, but suffer low recruitment. SLBs grow and survive poorly and hence remain short-statured, but produce large numbers of offspring (9). However, we are lacking a systematic assessment of how important these tradeoffs are for predicting forest composition and carbon dynamics.

We parameterized a forest model based on height-structured competition for light (10, 11) with demographic tradeoffs derived from forest inventory data to uncover the essential number of demographic niches needed to accurately predict compositional changes during tropical forest succession. The model simulates the dynamics of a potentially large number of species based on a small set of demographic rates (growth, survival, recruitment) and accounts for height-structured competition for light by distinguishing up to four dynamic canopy layers (12). Canopy gaps are filled by the tallest trees from lower canopy layers, without regard for their horizontal position (10).

Our study site is the tropical moist forest at Barro Colorado Island (BCI), Panama, where recruitment, growth and survival of individual trees has been monitored in a 50-ha plot for over 30 years (2, 12, 13). To account for height-structured competition, we assigned all monitored individuals of 282 tree and shrub species to one of four canopy layers based on their size and the size of their neighbors (12, 14) and estimated model parameters (annual diameter growth and survival rates) for each species in each canopy layer (9). Additionally, we calculated species recruitment rates per unit of basal area. A dimension reduction of model parameters (weighted PCA, 15) reveals the two demographic tradeoffs, i.e. the growth–survival tradeoff and the stature–recruitment tradeoff, which together explain 65% of demographic variation among the 282 species (Fig. 1).

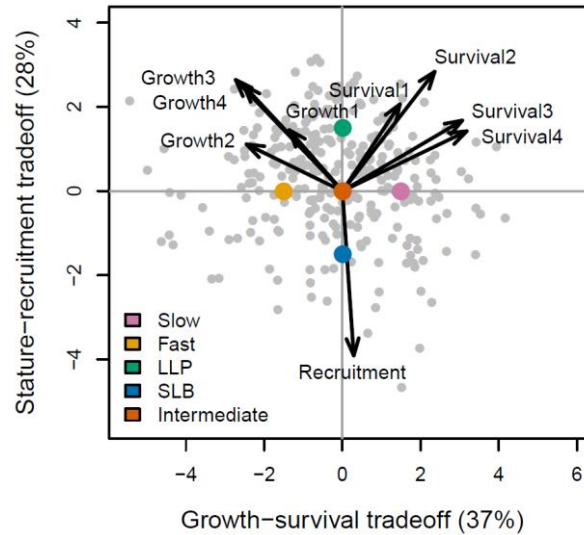

**Fig. 1: Demographic tradeoffs.** Demographic variation of 282 tree species at BCI, Panama (grey dots), is characterized by the growth–survival tradeoff (1st axis) distinguishing fast and slow species and a stature–recruitment tradeoff (2nd axis) distinguishing long-lived pioneers (LLP) and short-lived breeders (SLB). Arrows show loadings of a weighted PCA on annual diameter growth and survival rates of individuals  $\geq 1$  cm diameter in four canopy layers and the number of sapling recruits per unit of basal area. Colored dots are locations in demographic space of plant functional types that were used in model scenarios 1 and 3.

Our goal here is to explore whether this low-dimensional demographic tradeoff space can explain tropical forest dynamics, and if so, how much diversity along the tradeoff axes is necessary to accurately predict successional changes in species composition and basal area (a proxy for biomass carbon storage). We used species’ positions in the tradeoff space to back-calculate model parameters for all 282 species (12), thus smoothing across observed relationships between demographic rates. We simulated forest dynamics under four scenarios that differed in the number of tradeoffs (1 versus 2) and level of demographic diversity (number of simulated species or plant functional types (PFTs), Table 1, Fig. 2A).

**Table 1: Model scenarios.** Model scenarios differ in the number of included tradeoffs and level of demographic diversity (few PFTs vs 282 species). LLP – long-lived pioneers, SLB – short-lived breeders.

| Scenario | Tradeoffs                            | Demographic diversity                       |
|----------|--------------------------------------|---------------------------------------------|
| 1        | Growth–Survival                      | 3 PFTs (fast, intermediate, slow)           |
| 2        | Growth–Survival                      | 282 species                                 |
| 3        | Growth–Survival, Stature–Recruitment | 5 PFTs (fast, slow, LLP, SLB, intermediate) |
| 4        | Growth–Survival, Stature–Recruitment | 282 species                                 |

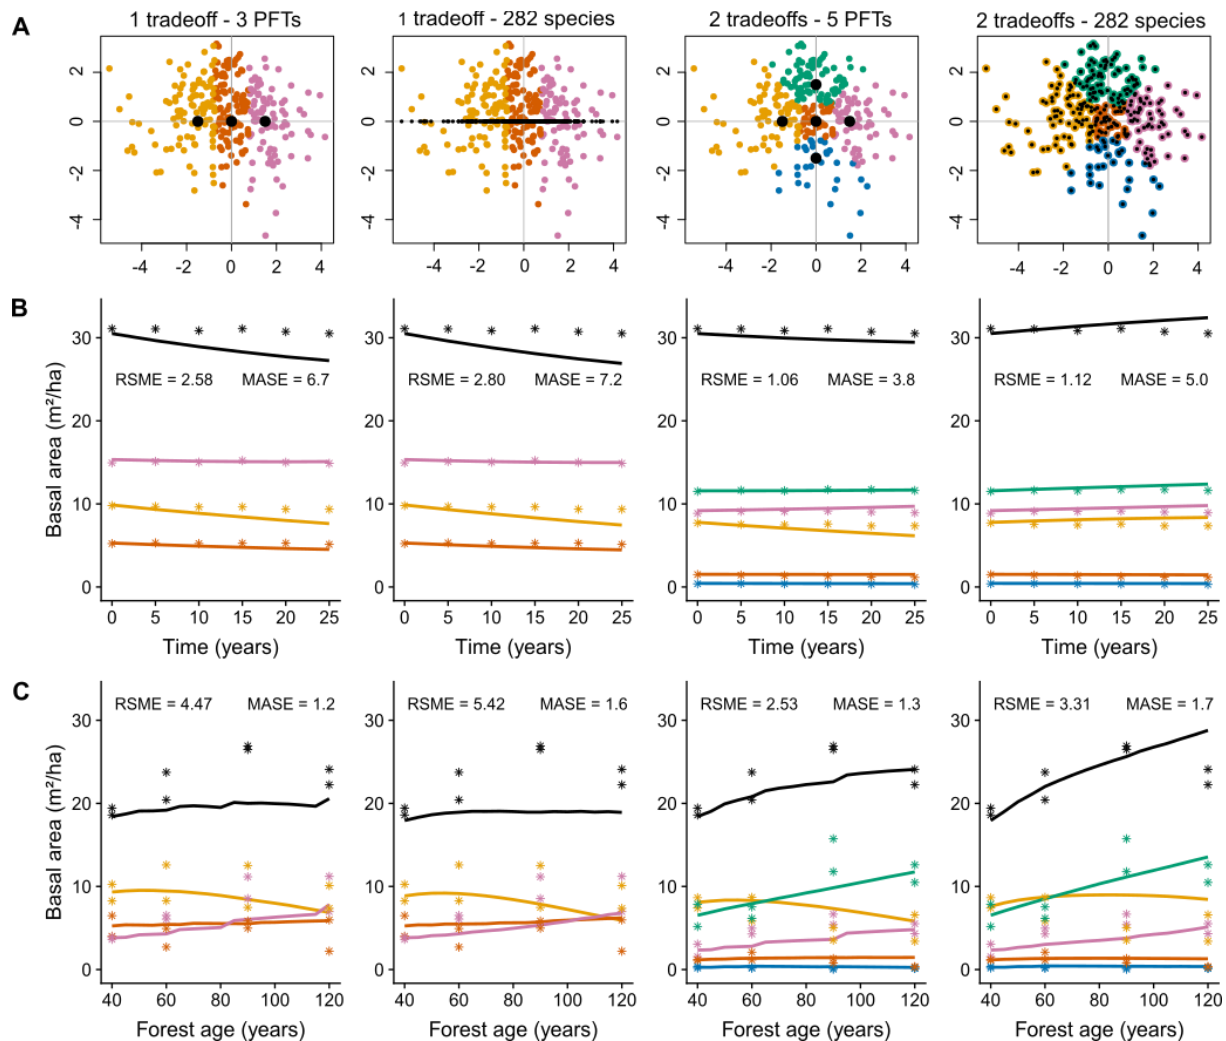

100 **Fig. 2: Predicted and observed basal area in four model scenarios (Table 1).** (A) Locations  
of species (colored dots) and representative plant functional types (PFTs) or species used for  
model scenarios (black dots) in demographic space; each species was assigned to a PFT based on  
proximity in demographic space and color-coded as in Fig. 1. (B) Predicted (lines) and observed  
105 (asterisks) basal area by PFT in old-growth tropical forest (BCI, black is total basal area) and (C)  
secondary tropical forest (BCNM). RSME is the root mean square error of prediction of total  
basal area, MASE is the mean absolute scaled error of PFT-level predictions (12).

As a first test of predictive ability, we compared the observed dynamics of the 50-ha old-  
110 growth plot in BCI over 25 years with model predictions. We initialized the model with  
inventory data from 1985 and simulated forest dynamics until 2010. When only the growth-  
survival tradeoff was used, basal area was predicted to decline because of a decline of the  
number of trees >20 cm diameter, especially of fast species (Figs. 2B, S1). Including the stature-  
recruitment tradeoff axis improved the match between predicted and observed basal area (Fig.  
2B) and above-ground biomass (AGB, Fig. S2) for different PFTs and size classes (Figs. S3, S4).  
115 However, when all species were simulated individually (scenario 4), the number of large trees  
(>60 cm diameter) and basal area were predicted to increase (Fig. S1). Maximum diameters were

accurately predicted by all scenarios, except for scenario 2, where observed maximum diameters >150 cm were not reproduced (Fig. S5). The species-level parameterizations (scenarios 2 and 4) also reproduced the rank-abundance curve (Fig. S6).

120 As a second test of model performance, we initialized the model with data from 40-year  
old secondary forests in the Barro Colorado Nature Monument (BCNM) that are regenerating  
after abandonment from agricultural land use (16). We compared model predictions with  
observations from a chronosequence of 60, 90, and 120-year old secondary forests (two 1-ha  
plots in each age class). This is a strong test of model performance, because the model was  
125 parameterized with demographic data only from old-growth forest.

As in old-growth forest, predictions of secondary succession were most accurate when  
forest diversity was represented by 5 PFTs spanning both demographic tradeoffs. When only the  
growth–survival tradeoff was used, the increase of basal area (Fig. 2C) and AGB (Fig. S2)  
during succession was underestimated, because the number of large trees (>60 cm diameter) was  
130 underestimated (Fig. S7). In contrast, when both tradeoffs were included, observed successional  
changes in basal area, AGB, and abundance for different PFTs and size classes were accurately  
reproduced (Figs. 2C, S2, S7–S9). However, when all species were simulated individually  
(scenario 4), the number of large trees (>60 cm diameter) and basal area of fast species and LLPs  
was overestimated. The observed peak in basal area in the 90-year old secondary forest is likely  
135 caused by remnant trees in the study plots and disappears when larger spatial scales are  
considered (17). The diameter distribution after 400 years of simulation closely matched the  
observed diameter distribution only when both demographic tradeoffs were used (Fig. 3A).

In a simulated long-term succession of scenario 3, slow species reached similar levels of  
basal area and AGB as LLPs after 400–500 years, and slow species and LLPs co-dominated the  
140 forest (Fig. S10). Fast species died out because the canopy gaps that they require for persistence  
(18) are treated in our model in a simplistic (non-spatially-explicit) manner. In reality, the forest  
is comprised of a mosaic of patches of different successional age since the last disturbance event  
(19). Comparing simulated successional trajectories of the fast and slow PFTs with observed  
species composition at the 0.1-ha scale allows inference of the patch-scale age distribution and  
145 suggests that the majority of the 0.1-ha patches within the BCI 50-ha plot are between 50 and  
250 years old (Fig. S11, 12). This model-inferred age distribution is consistent with LiDAR data  
collected on BCI, which suggest that between 0.43 and 1.6% of the area is disturbed every year,  
corresponding to an average disturbance interval between 63 and 233 years (12, 20). When we  
use the estimated proportion of 0.1-ha patches in each age class to generate the PFT-composition  
150 at equilibrium with the disturbance regime, predictions closely match observations (Fig. 3B).

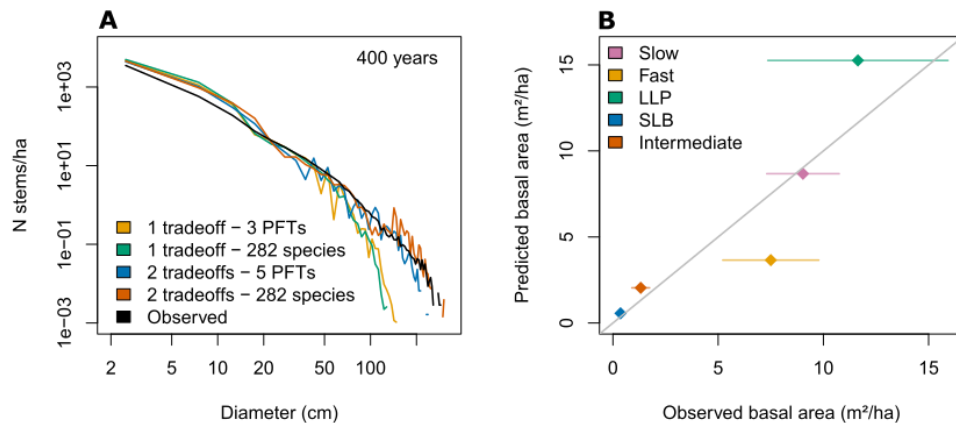

**Fig. 3: Model validation.** (A) Diameter distribution in 400-year old simulated forest for the four model scenarios. (B) Predicted and observed basal area per PFT in model scenario 3 (5 PFTs spanning two demographic tradeoffs). Observed basal area is from an old-growth tropical forest in BCI, Panama. Predicted basal area is based on the estimated number of 0.1-ha patches in each age class (Fig. S11, I2).

Our results clearly show that two demographic tradeoffs are needed to accurately predict successional patterns in tropical forest structure and composition. Considering only the fast–slow continuum of life-histories is not sufficient, because it ignores long-lived pioneers, one of the most important (in terms of tree size and AGB) components in many tropical forests. Although the existence of long-lived pioneers has long been recognized (5), they have often been assumed to be part of the fast–slow continuum, i.e. considered to be mid-successional, because they reach their highest basal area in intermediate stages of succession (6). However, recent analyses show that long-lived pioneers lie on a second demographic dimension (9), and we demonstrate here for the first time that this second dimension is needed to accurately predict tropical forest dynamics. Understanding general patterns of tropical forest dynamics will require moving away from viewing succession through a one-dimensional to a two-dimensional lens of demographic strategies.

Our results suggest that the forest at BCI is in equilibrium with the local disturbance regime. This helps to resolve a long-standing dispute of whether long-lived pioneers are a transient feature of successional forests (6, 21, 22) and shows that, in this forest, they are not transient, but an integral and dominant component of the old-growth forest. In fact, long-lived pioneers dominate most successional stages and contribute more AGB than any other demographic group, except in very young forests (<40 years) or patches that have remained undisturbed for a long time (>400 years). Long-lived pioneers are able to maintain populations in the absence of large-scale disturbances and compensate for their low recruitment by growing quickly up to the canopy or emergent layer where they may remain as seed sources for several centuries (9).

Our results also suggest that a small number of demographic niches is sufficient to capture the dynamics of the BCI forest. Specifically, just 5 PFTs were sufficient to adequately capture successional patterns of forest composition and carbon dynamics. This result does not rule out the importance of additional functional axes (e.g., drought tolerance) at broader spatial

or temporal scales, or the potential importance of individual species for ecosystem functioning. Nevertheless, our results suggest that functional diversity in species-rich tropical forests may be much smaller than taxonomic diversity, and that tropical forest diversity could be accurately represented in Earth System Models by a small number of PFTs that span the relevant functional axes (23).

This systematic assessment of the optimal demographic resolution was only possible because all model parameters are directly observable in the field, and because tradeoffs in model parameters capture the relevant dimensions of functional variation among species, with no need for perfect information for each species (23, 24). Most importantly, the close match between field observations and the definition of model parameters avoids the necessity for time-consuming and error-prone manual parameter tuning (25) or computationally-intensive inverse parameter fitting (26). More complex tropical forest models require data that are not available for most species, e.g. light transmission, light-use efficiency, respiration rates, seed-dispersal kernels, germination rates etc. (27). While such details can provide mechanistic insights, our simplified approach, based on observed recruitment rates, and growth, and mortality rates in different canopy layers, allowed for direct tests of hypotheses about demographic tradeoffs and functional diversity (e.g. 5 PFTs vs many species) in structuring tropical forest dynamics.

Together, the demographic forest model and the empirical demographic tradeoffs define an objective, reproducible, and automated workflow that scales up from demographic rates of individual species to community structure and dynamics. Given its ease of application and the increasing availability of tropical forest inventory data, this workflow has the potential to substantially advance theoretical understanding of tropical forest dynamics by comparing demographic diversity, structure, and dynamics of forests that differ in climate, floristic composition, and/or disturbance regime. It also has the potential to facilitate the evidence-based planning of forest restoration and sustainable tropical forest management by providing improved quantitative tools for predicting rates and trajectories of forest regrowth (4, 9). Lastly, the two-dimensional tradeoff studied here could also be combined with other key axes (e.g. drought tolerance) in a low-dimensional tradeoff space, allowing for improved representation of tropical forest functional diversity in Earth System Models (23).

215

## Materials and Methods

### The PPA model

We used a version of the PPA model that is based on Purves et al. (11), where tree crowns are assumed to be flat. The simulation area was 1 ha and the model time step was 5 years. The model works on cohorts of trees that share the same age, diameter at breast height (dbh, in cm) and species/plant functional type (PFT). The number of trees in a cohort can be fractions of individuals, including numbers <1. Cohorts are removed from the simulation when they have <0.001 individuals. We extended the model from two to four canopy layers (14) and species/PFTs are characterized by growth and mortality rates in each of the four layers. We modified several aspects of the model. Cohorts are removed if they are assigned to a layer >4. Sapling cohorts enter the model at 1 cm dbh (originally 0.01 cm). Recruitment rates are constant (see below, originally they scaled with a species' crown area in the canopy layer). Sapling

230 cohorts recruit to layer 4. The dbh (cm)-crown radius (m) relationship is nonlinear (originally linear),

$$\text{crown radius} = 0.5 * \text{dbh}^{0.62}.$$

Likewise, the dbh (cm)-height (m) relationship is non-linear and parameters for both allometries were determined using data from BCI (28),

$$\text{height} = 11 * (\text{dbh}/10)^{0.5}.$$

235 As a single allometry for all trees worked equally well as species-specific allometries in determining structural and dynamics properties of the forest (14), we used a single allometry for crown radius and height.

To calculate above-ground biomass (AGB, Mg), we followed ForestGEO protocols and used allometric equations based only on dbh and wood density (wd), but not height, from Chave et al.

240 (29) for moist tropical forest:

$$\text{AGB} = (\text{wd} * \exp(-1.499 + 2.148 * \log(\text{dbh}) + 0.207 * \log(\text{dbh})^2 - 0.0281 * \log(\text{dbh})^3) / 1000),$$

where dbh is measured in cm and wd in g/cm<sup>3</sup>.

### Parameterization

245 In a previous study, we performed a weighted PCA (15) on nine demographic parameters for 282 species from the BCI 50-ha plot, namely growth rate in the four canopy layers, survival (expressed as lifespan) in the four canopy layers, and the number of recruits per unit of adult basal area, which were derived from forest inventory data (9, 30). We follow the taxonomy as of 2017 (31). The first two principal components of this PCA correspond to the fast-slow continuum (37% explained variation) and a stature-recruitment tradeoff (28% explained variation), respectively. Here we used a slightly modified version of the PCA using the number of recruits per unit of total species' basal area, and used the first two principal components (henceforth 'axes' or 'tradeoffs') to determine model parameters. An exception are recruitment rates, which we determined directly from forest inventory data (independent of the basal area of a species and independent from the PCA). We assumed recruitment rates to be constant over time because the 50-ha plot is embedded within a larger forest area from which seeds continuously arrive into the study area. Moreover, relationships between recruitment rates per PFT and total basal area in 31.25 x 31.25 m<sup>2</sup> subplots or basal area of the respective PFT were weak or absent (not shown).

260 To determine growth and mortality rates, we specified coordinates of five PFTs symmetrically in the two-dimensional demographic space (Fig. 1 in main manuscript):

- Intermediate (location  $x_1=0, x_2=0$ )
- Fast (location  $x_1=-1.5, x_2=0$ )
- Slow (location  $x_1=1.5, x_2=0$ )
- 265 - Long-lived pioneer (LLP, location  $x_1=0, x_2=1.5$ )
- Short-lived breeder (SLB, location  $x_1=0, x_2=-1.5$ )

Coordinates of +/-1.5 on the two tradeoff axes correspond to between 9 and 19% of species having more extreme demographic strategies.

270 For the simulations including all species, we used their PCA scores along the 1<sup>st</sup> or 1<sup>st</sup> and 2<sup>nd</sup> PCA tradeoff axis, depending on the scenario.

We then solved the linear system of equations consisting of the PCA loadings of the nine parameters (Table S1) and species' scores (setting all species' scores on axes 3 to 9 to 0, i.e.  $x_3 \dots x_9 = 0$ ) to obtain transformed input parameters to the PCA. These were then back-



transformed to model parameters by de-centering, de-scaling, and de-logging. Lifespan was  
275 transformed into mortality, i.e. mortality = 1/lifespan (Tables S2,S3).

From these strategies, we simulated four scenarios, differing in the number of species/PFTs:

1. 1 tradeoff, 3 PFTs (fast, intermediate, slow)
2. 1 tradeoff, 282 species
- 280 3. 2 tradeoffs, 5 PFTs (slow, fast, LLP, SLB, intermediate)
4. 2 tradeoffs, 282 species.

Annual recruitment rates (at 1 cm dbh) for each PFT were determined as the average number  
of recruits (per ha) of species that were assigned to the PFT. For scenarios (2) and (4), species  
without observed recruits (25 species) were assigned one recruit in 25 years and 50 ha, i.e.  
0.0008 recruits per year and ha. New recruits enter the simulation every year and experience  
285 deterministic mortality every year. However, annual recruit numbers were determined from 5-  
year census intervals. Thus, we adjusted annual recruit numbers by species/PFT-specific  
mortality such that, after a 5-year time step, simulated recruit numbers matched observed  
average recruit numbers in 5-year census intervals in the 50-ha plot at BCI.

Wood density (wd) for PFTs was determined as the volume-weighted mean of wd in old-  
290 growth forest. Wood density is from bci.spptable (32; sometimes to genus or family level only).  
Individual tree volume was calculated as

$$\text{volume} = \exp(-1.499 + 2.148 * \log(\text{dbh}) + 0.207 * \log(\text{dbh})^2 - 0.0281 * \log(\text{dbh})^3) / 1000.$$

Volume-weighted wood density of the PFTs in secondary forest was slightly different from  
that of the PFTs in the old-growth forest, due to differences in species' abundance. We used the  
295 volume-weighted wood density of the PFTs in old-growth forest, when we calculated AGB in  
simulations of old-growth forest dynamics, and wood density of the PFTs in secondary forest  
plots, when we calculated AGB in simulations of secondary forest succession.

#### Species assignment to PFTs, model initialization and validation

300 *Old-growth forest* – In the 50-ha permanent plot in tropical moist forest on Barro Colorado  
Island (BCI), Panama, every tree  $\geq 1$  cm dbh is tagged, mapped, and measured approximately  
every five years (30). In this paper our analyses are based on six censuses (conducted between  
1985 and 2010). We leave out the first census of 1982 because in this census some tall trees with  
buttresses were measured at lower heights than in subsequent censuses introducing a bias in  
305 basal area and AGB estimates. Detailed methods for the plot censuses can be found in (2) and  
(13).

For comparison of model predictions with data, we assigned species to PFTs based on their  
PCA scores along the 1<sup>st</sup> or 1<sup>st</sup> and 2<sup>nd</sup> PCA axis. For scenarios (1) and (3), we assigned species  
to the PFT with the closest location that was used for parameterization (Figs. 1, 2A in main  
310 manuscript). For scenario (1), 98 species were assigned to the 'fast' PFT, 83 to the 'slow' PFT,  
and 101 to the 'intermediate' PFT. For scenario (3), 75 species were assigned to the 'fast' PFT,  
76 to the 'LLP' PFT, 60 to the 'slow' PFT, 30 to the 'SLB' PFT, and 41 to the 'intermediate'  
PFT. For visualization purposes, we used the same PFT assignments for scenarios (2) and (4),  
where all species were simulated individually.

315 For simulation of old-growth forest dynamics, we initialized the model with the average (in  
terms of species abundances and tree sizes) of the 50-ha plot on Barro Colorado Island in 1985.  
Individuals of species that were not included in the PCA (mostly palms and hemiepiphytes, 1.4%  
of individuals, 3.5% of basal area) were omitted in these calculations as they could not be  
associated with a PFT. Thus, the initial state of the model is slightly less populated than the real

320 forest. Species were assigned to one of 111 size classes and tree numbers were aggregated by  
size class and species/PFT. Size classes were 1 cm wide for individuals between 1 and 50 cm  
dbh, 2 cm wide for individuals between 50 and 100 cm dbh, and 5 cm wide for larger  
individuals. The lower limit of the size class was used as initial cohort size in the PPA model.

We validated the model against field data in terms of overall basal area, AGB, and  
325 abundance per PFT, as well as in different size classes. Forest structure and composition was  
determined from the six censuses of the 50-ha plot (1985–2010). Basal area and AGB were  
compared for the size classes 1–20 cm, 20–60 cm,  $\geq 60$  cm,  $\geq 1$  cm dbh (total). Abundance was  
compared for the size classes 5–20 cm, 20–60 cm,  $\geq 60$  cm,  $\geq 5$  cm dbh (total).

As measures of predictive power, we calculated the root mean square error (RMSE) of  
330 prediction for total basal area. RMSE measures the average deviation of the predicted value from  
the observed value and is in the same unit as observations ( $\text{m}^2/\text{ha}$ ). We also calculated the mean  
absolute scaled error (MASE) to compare the predictive power of different model  
parameterizations at the PFT level that are at different scales (33). MASE is scale-independent  
and measures the predictive power of a model relative to a naïve random walk forecast.

335 We compared simulated (after 100 years of simulation) and observed maximum diameters.  
Maximum diameter for each PFT in the field data and the simulations was calculated as the  
largest 5-cm diameter class with  $>0.1$  individuals per ha. For parameterizations (2) and (4) (282  
species), it was calculated for each species as the largest 5-cm diameter class with  $>0.005$   
individuals per ha. For parameterizations (2) and (4) (282 species), we additionally compared  
340 simulated and observed rank-abundance curves. Observed abundance was calculated as average  
abundance per ha over six censuses (1985–2010). We used the ‘RADanalysis’ package in R (34)  
to construct a rank abundance distribution using the max rank normalization method.

We compared the diameter distribution of simulated 400-year old forest with the observed  
diameter distribution of the old-growth forest. The observed diameter distribution again is an  
345 average of six censuses and includes palms and hemiepiphytes.

*Secondary forest* – Data on secondary forests is from eight forest plots (1 ha each)  $<7$  km away  
from the old-growth forest plot (16, 35, 36). There were two plots in each of four age classes (40,  
60, 90, and 120 years). All secondary forest stands had been in agriculture, including pasture,  
350 swidden farming, and plantation farming, for undetermined lengths of time prior to fallow (16).  
The plots were inventoried between 2011 and 2014. In all plots, every tree  $\geq 5$  cm dbh was  
tagged, mapped, and measured, and in most of the plots, in a 0.5-ha subset of the plot every tree  
 $\geq 1$  cm dbh was tagged, mapped, and measured. We only considered the largest stem of multi-  
stemmed individuals to match old-growth forest data.

355 We excluded 254 individuals without recorded dbh as well as palms (8 species, 474  
individuals), hemiepiphytes (1 species, 4 individuals), cultivated species (1 species, 1  
individual), and unidentified individuals (214). Of the remaining 242 species (9935 individuals),  
we had no information on demographic strategy from the old-growth forest for 50 species (1212  
individuals). We assigned some of these species to the PFTs of a closely related species, and  
360 others based on average demographic characteristics of taxonomically-related species and/or  
species with similar functional traits, i.e. wood density and growth form. Wood density and  
growth form is from *bci.spptable* (32; sometimes to genus or family level only).

For simulation of secondary forest succession, we initiated the model with the average of  
two 1-ha 40-year old secondary forest plots. Species were assigned to one of 111 size classes and  
365 tree numbers were aggregated by size class and PFT. Size classes were 1 cm wide for individuals

between 1 and 50 cm dbh, 2 cm wide for individuals between 50 and 100 cm dbh, and 5 cm wide for larger individuals. The lower limit of the size class was used as initial cohort size in the PPA model.

370 We validated the model against field data in terms of total basal area, AGB, and abundance per PFT, as well as in different size classes. Basal area, AGB, and abundance were compared for the size classes 5–20 cm, 20–60 cm,  $\geq 60$  cm,  $\geq 5$  cm dbh (total), because sampling of the different secondary forest plots  $<5$  cm dbh was inconsistent. To calculate RSME and MASE, we averaged the observations in the two 1-ha plots per age class to yield a single time series of basal area.

375

### Disturbance regime

Analyses from detailed LiDAR data from the year 2009 estimated 0.43% of the area of BCI to be canopy gaps with  $<2$  m canopy height and 1.6% of the area to be canopy gaps  $<5$  m canopy height (20). Assuming that the vegetation can re-grow to a canopy height between 2 and 5 m within one year, the fraction of the forest that is disturbed every year is between 0.43 and 1.6%. This corresponds to an average disturbance interval between 62.5 (100/1.6) and 232.6 (100/0.43) years.

380

### Age distribution and simulated equilibrium mixed forest

385 We divided inventory data from the six censuses between 1985 and 2010 from the 50-ha plot into 512 31.25 m x 31.25 m subplots and calculated the basal area ( $\text{m}^2/\text{ha}$ ) of species assigned to the slow and fast PFTs of scenario (3) for each subplot. Then, we determined the year (in steps of 5 years) in a simulated succession to which the basal area of fast and slow PFTs in each subplot was most similar, respectively, and took their mean. As the model was initialized with inventory data from 40-year old forest, we linearly extrapolated the basal area of PFTs for younger ages between 0  $\text{m}^2/\text{ha}$  for year 0 and the observed basal area at year 40. The resulting combined (across censuses) age distribution of subplots (Fig. S11) was then used to generate a ‘simulated’ equilibrium of the mixed forest as the sum of simulated basal area or AGB of the respective ages, weighted by the proportion of subplots in the respective age class. Note: We only considered the fast and slow PFTs because they show a clear successional pattern, while LLPs maintain high and SLBs and the intermediate PFT maintain low basal area throughout much of the succession.

390

395

### **Acknowledgments**

We thank D. Purves for sharing the PPA model code and D. Purves, S. A. Bohlman and H. C. Muller-Landau for inspiring discussions and helpful suggestions; **Funding:** N.R. was funded by a research grant from Deutsche Forschungsgemeinschaft DFG (RU 1536/3-1). N.R. and C.W. acknowledge the support of the German Centre for Integrative Biodiversity Research (iDiv) funded by Deutsche Forschungsgemeinschaft DFG (FZT 118). The BCI forest dynamics research project was founded by S. P. Hubbell and R. B. Foster and is now managed by R. Condit, S. Lao, and R. Perez under the Center for Tropical Forest Science and Smithsonian Tropical Research Institute in Panama. Numerous organizations have provided funding, principally the U.S. National Science Foundation, and hundreds of field workers have contributed.; The secondary forest data collection was funded by a grant from SENACYT (COL10-052) to D.D., S.D. and O.L.

410

## Author contributions

N.R. designed the research with input from C.F., J.L., and C.W. N.R. and C.F. performed the research. R.C., D.D., S.D., S.H., and O.L. provided data. N.R. drafted the first version of the paper, and all authors contributed to subsequent versions of the paper.

415

## References and Notes:

1. Food and Agriculture Organization of the United Nations. *Global Forest Resources Assessment*. FAO Forestry Paper 163 (FAO, 2010).
2. S. P. Hubbell, R. B. Foster, S. T. O'Brien, K. E. Harms, R. Condit, B. Wechsler, S. J. Wright, S. Loo de Lao, Light-gap disturbances, recruitment limitation, and tree diversity in a Neotropical forest. *Science* 283, 554–557 (1999).
3. G. B. Bonan, Forests and climate change: Forcings, feedbacks, and the climate benefits of forests. *Science* 320, 1444–1449 (2008).
4. E. Rutishauser, B. Hérault, C. Baraloto, L. Blanc, L. Descroix, E. Doff Sotta, J. Ferreira, M. Kanashiro, L. Mazzei, M. V. N. d'Oliveira, L. C. de Oliveira, M. Peña-Claros, F. E. Putz, A. R. Ruschel, K. Rodney, A. Roopsind, A. Shenkin, K. E. da Silva, P. Sist, Rapid tree carbon stock recovery in managed Amazonian forests. *Curr. Biol.* 25, R787–R788 (2015).
5. R. L. Chazdon, *Second Growth: The promise of tropical forest regeneration in an age of deforestation*. (The University of Chicago Press, Chicago, 2014).
6. B. Finegan, Pattern and process in neotropical secondary rain forests: The first 100 years of succession. *Trends Ecol. Evol.* 11, 119–124 (1996).
7. P. B. Reich, The world-wide “fast–slow” plant economics spectrum: a traits manifesto. *J. Ecol.* 102, 275–301 (2014).
8. T. Kohyama, E. Suzuki, T. Partomihardjo, T. Yamada, T. Kubo, Tree species differentiation in growth, recruitment and allometry in relation to maximum height in a Bornean mixed dipterocarp forest. *J. Ecol.* 91, 797–806 (2003).
9. N. Rüger, L. S. Comita, R. Condit, D. Purves, B. Rosenbaum, M. D. Visser, S. J. Wright, C. Wirth, Beyond the fast–slow continuum: demographic dimensions structuring a tropical tree community. *Ecol. Lett.* 21, 1075–1084 (2018).
10. N. Strigul, D. Pristinski, D. Purves, J. Dushoff, S. Pacala, Scaling from trees to forests: Tractable macroscopic equations for forest dynamics. *Ecol. Monogr.* 78, 523–545 (2008).
11. D. W. Purves, J. W. Lichstein, N. Strigul, S. W. Pacala, Predicting and understanding forest dynamics using a simple tractable model. *Proc. Natl. Acad. Sci. U.S.A.* 105, 17018–17022 (2008).
12. Materials and methods are available as supplementary materials on *Science* Online.
13. R. Condit, *Tropical Forest Census Plots* (Springer-Verlag, Berlin, Germany, and R. G. Landes Company, Georgetown, TX, 1998).

- 450 14. S. Bohlman, S. Pacala, A forest structure model that determines crown layers and partitions growth and mortality rates for landscape-scale applications of tropical forests. *J. Ecol.* 100, 508–518 (2012).
15. L. Delchambre, Weighted principal component analysis: a weighted covariance eigendecomposition approach. *Mon. Not. R. Astron. Soc.* 446, 3545–3555 (2014).
16. J. S. Denslow, S. Guzman, Variation in stand structure, light and seedling abundance across a tropical moist forest chronosequence, Panama. *J. Veg. Sci.* 11, 201–212 (2000).
- 455 17. J. Mascaro, G. P. Asner, D. H. Dent, S. J. DeWalt, J. S. Denslow, Scale-dependence of aboveground carbon accumulation in secondary forests of Panama: A test of the intermediate peak hypothesis. *For. Ecol. Manage.* 276, 62–70 (2012).
18. M. D. Swaine, T. C. Whitmore, On the definition of ecological species groups in tropical rain forests. *Vegetatio* 75, 81–86 (1988).
- 460 19. J. Q. Chambers, I. Negron-Juarez, D. Magnabosco Marra, A. Di Vittorio, J. Tews, D. Roberts, G. H. Ribeiro, S. E. Trumbore, N. Higuchi, The steady-state mosaic of disturbance and succession across an old-growth Central Amazon forest landscape. *Proc. Natl. Acad. Sci. U.S.A.* 110, 3949–3954 (2013).
- 465 20. E. Lobo, J. W. Dalling, Spatial scale and sampling resolution affect measures of gap disturbance in a lowland tropical forest: implications for understanding forest regeneration and carbon storage. *Proc. R. Soc. London Ser. B* 281, 20133218 (2014).
21. R. Condit, R. Sukumar, S. P. Hubbell, R. B. Forster, Predicting population trends from size distributions: a direct test in a tropical tree community. *Am. Nat.* 152, 495–509 (1998).
- 470 22. D. Sheil, D. F. R. P. Burslem, Disturbing hypotheses in tropical forests. *Trends Ecol. Evol.* 18, 18–26 (2003).
23. D. W. Purves, S. W. Pacala, Predictive models of forest dynamics. *Science* 320, 1452–1453 (2008).
- 475 24. A. T. Clark, C. Lehman, D. Tilman, Identifying mechanisms that structure ecological communities by snapping model parameters to empirically observed tradeoffs. *Ecol. Lett.* 21, 494–505 (2018).
25. M. Kazmierczak, T. Wiegand, A. Huth, A neutral vs. non-neutral parametrizations of a physiological forest gap model. *Ecol. Model.* 288, 94–102 (2014).
- 480 26. F. Hartig, C. Dislich, T. Wiegand, A. Huth, Technical Note: Approximate Bayesian parameterization of a process-based tropical forest model. *Biogeosciences* 11, 1261–1272 (2014).
27. R. Fischer, F. Bohn, M. Dantas de Paula, C. Dislich, J. Groeneveld, A. G. Gutiérrez, M. Kazmierczak, N. Knapp, S. Lehmann, S. Paulick, S. Pütz, E. Rödig, F. Taubert, P. Köhler, A. Huth, Lessons learned from applying a forest gap model to understand ecosystem and carbon dynamics of complex tropical forests. *Ecol. Model.* 326, 124–133 (2016).
- 485 28. I. Martínez Cano, H. C. Muller-Landau, S. J. Wright, S. A. Bohlman, S. W. Pacala, Tropical tree height and crown allometries for the Barro Colorado Nature Monument, Panama: a

- comparison of alternative hierarchical models incorporating interspecific variation in relation to life history traits. *Biogeosciences* 16, 847–862 (2019).
- 490 29. J. Chave, C. Andalo, S. Brown, M. A. Cairns, J. Q. Chambers, D. Eamus, H. Fölster, F. Fromard, N. Higuchi, T. Kira, J.-P. Lescure, B. W. Nelson, H. Ogawa, H. Puig, B. Riéra, T. Yamakura, Tree allometry and improved estimation of carbon stocks and balance in tropical forests. *Oecologia* 145, 87–99 (2005).
- 495 30. R. Condit, S. Lao, R. Pérez, S. B. Dolins, R. B. Foster, S. P. Hubbell, *Barro Colorado Forest Census Plot Data*, 2012 Version. Center for Tropical Forest Science Databases. (2012) DOI <http://dx.doi.org/10.5479/data.bci.20130603>.
- 500 31. R. S. Condit, S. Aguilar, R. Pérez, S. Lao, S. P. Hubbell, R. B. Foster, *Barro Colorado 50-ha Plot Taxonomy 2017*. Center for Tropical Forest Science Databases. (2017) DOI <http://dx.doi.org/10.25570/stri/10088/32990>.
- 505 32. R. S. Condit, S. Aguilar, R. Pérez, S. Lao, R. B. Foster, S. P. Hubbell, *Complete data from the Barro Colorado 50-ha plot: 423617 trees, 35 years, v3*, DataONE Dash, Dataset, (2019) DOI <https://doi.org/10.15146/5xcp-0d46>.
33. R. J. Hyndman, A. B. Koehler. Another look at measures of forecast accuracy. *Int. J. Forecast.* 22, 679–688 (2006).
- 510 34. R Development Core Team. (2019). R: a language and environment for statistical computing [WWW Document]. Available at: <http://www.r-project.org>. Last accessed 16 August 2019.
35. D. H. Dent, S. J. DeWalt, J. S. Denslow, Secondary forests of central Panama increase in similarity to old-growth forest over time in shade tolerance but not species composition. *J. Veg. Sci.* 24, 530–542 (2013).
- 510 36. I. L. Jones, S. J. DeWalt, O. R. Lopez, L. Bunnefeld, Z. Pattison, D. H. Dent, Above- and belowground carbon stocks are decoupled in secondary tropical forests and are positively related to forest age and soil nutrients respectively. *Sci. Total Environ.* 697:133987 (2019).

## Supplementary Figures and Tables

515

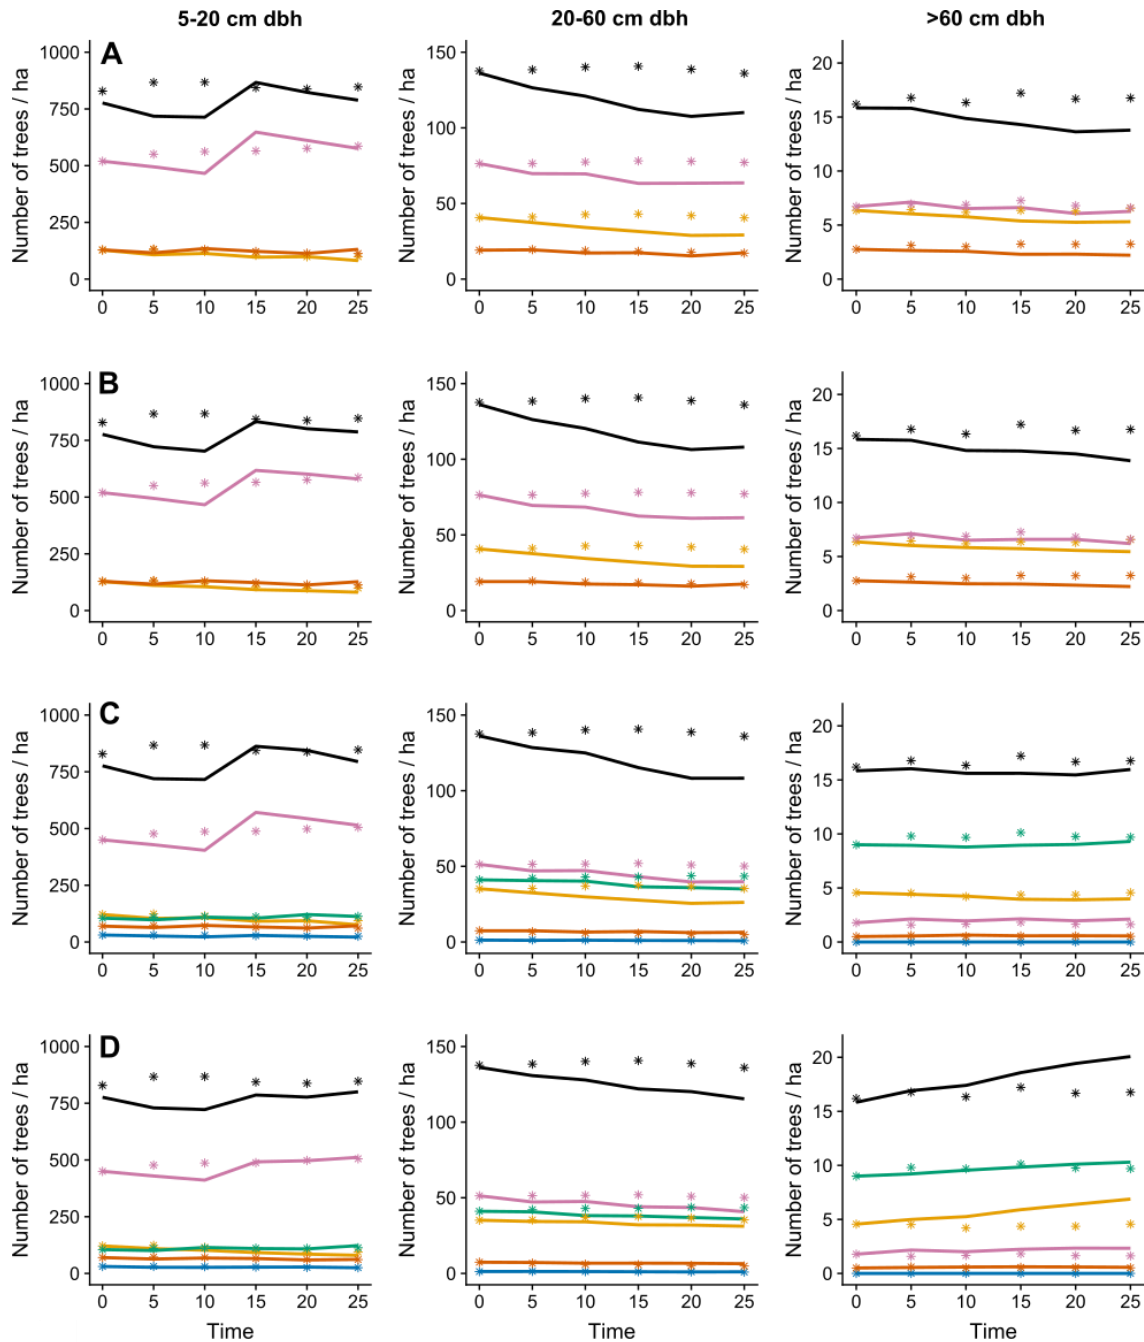

**Fig. S1.**

Predicted and observed abundance in four model scenarios (rows; A: 1 tradeoff – 3 PFTs, B: 1 tradeoff – 282 species, C: 2 tradeoffs – 5 PFTs, D: 2 tradeoffs – 282 species) and three size classes (columns). Simulated (lines) and observed (asterisks) abundance per PFT in an old-growth tropical forest in Barro Colorado Island, Panama. Color code: purple – slow, yellow – fast, green – LLP, blue – SLB, red – intermediate, black – total.

520

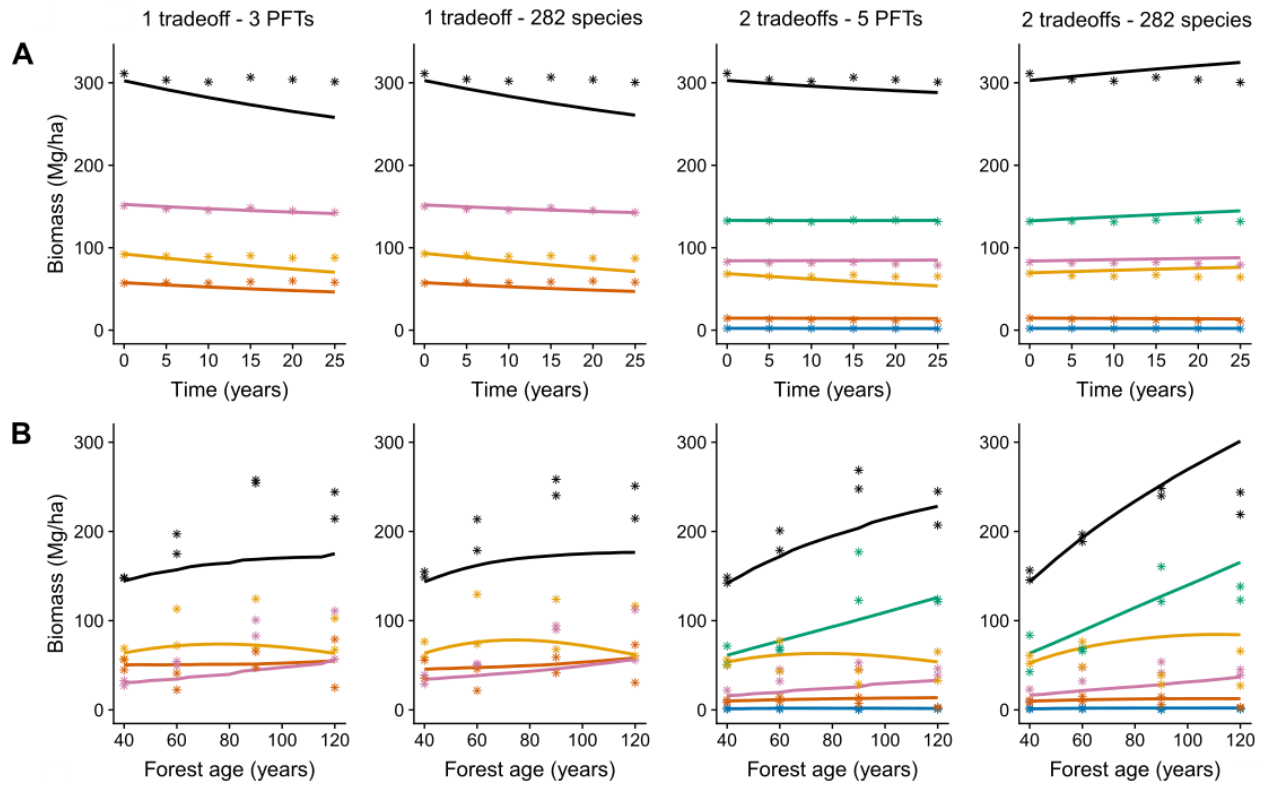

**Fig. S2.**

525 Predicted and observed aboveground biomass (AGB) in four model scenarios that differ in the  
 number and demographic characteristics of simulated species or PFTs. (A) Predicted (lines) and  
 observed (asterisks) biomass per PFT in an old-growth tropical forest in Barro Colorado Island,  
 Panama ( $\geq 1$  cm dbh) and (B) in secondary tropical forest in Barro Colorado Nature Monument  
 National Park, Panama ( $\geq 5$  cm dbh). Color code: purple – slow, yellow – fast, green – LLP, blue  
 530 – SLB, red – intermediate, black – total.



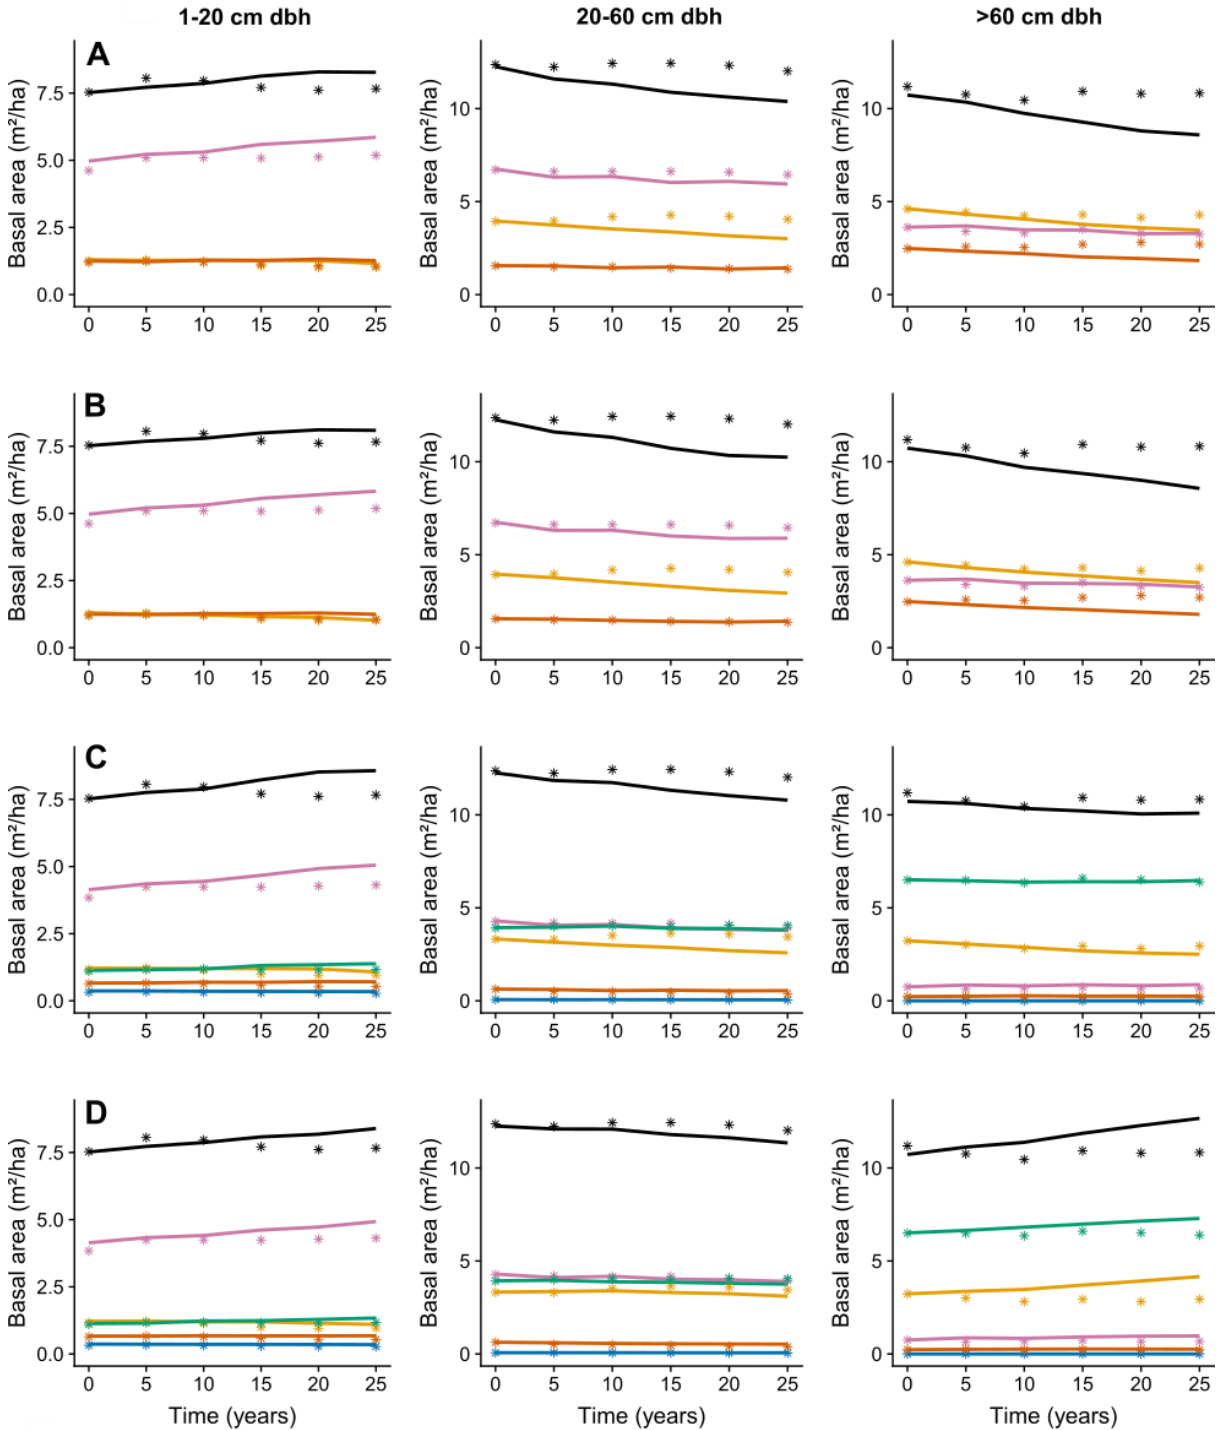

**Fig. S3.**

Predicted and observed basal area in four model scenarios (rows; A: 1 tradeoff – 3 PFTs, B: 1 tradeoff – 282 species, C: 2 tradeoffs – 5 PFTs, D: 2 tradeoffs – 282 species) and three size classes (columns). Simulated (lines) and observed (asterisks) basal area per PFT in an old-growth tropical forest in Barro Colorado Island. Color code: purple – slow, yellow – fast, green – LLP, blue – SLB, red – intermediate, black – total.

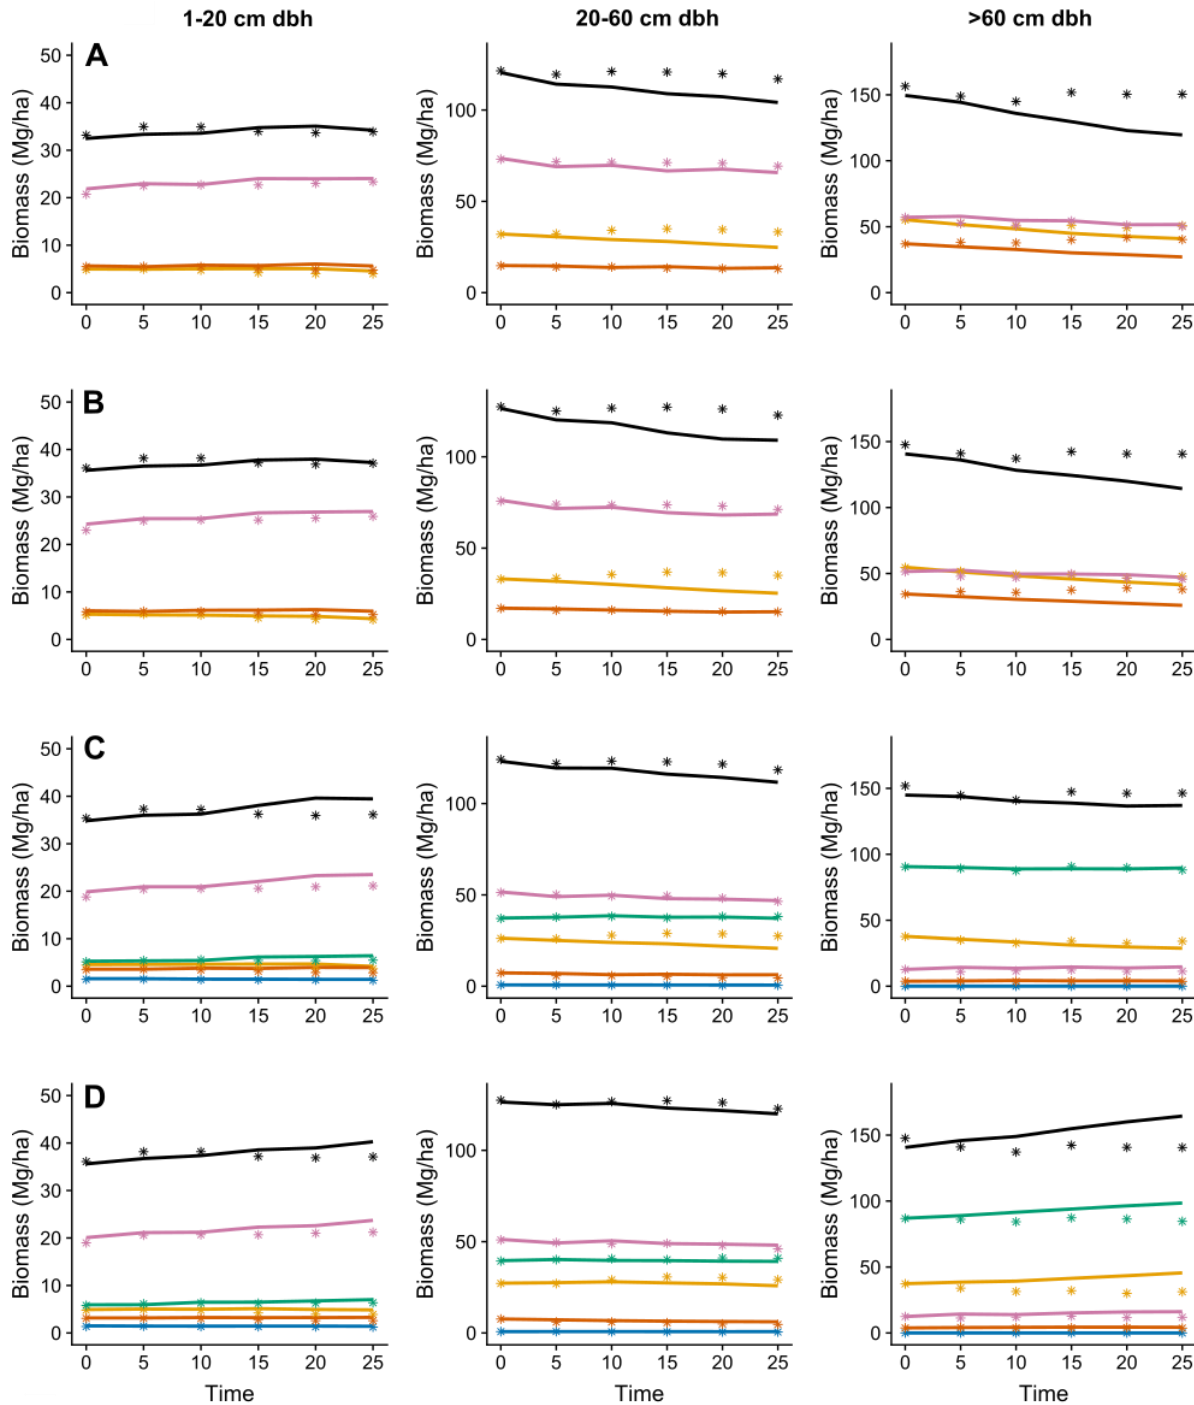

**Fig. S4.**

540 Predicted and observed above-ground biomass (AGB) in four model scenarios (rows; A: 1 tradeoff – 3 PFTs, B: 1 tradeoff – 282 species, C: 2 tradeoffs – 5 PFTs, D: 2 tradeoffs – 282 species) and three size classes (columns). Simulated (lines) and observed (asterisks) biomass per PFT in an old-growth tropical forest in Barro Colorado Island, Panama. Color code: purple – slow, yellow – fast, green – LLP, blue – SLB, red – intermediate, black – total.

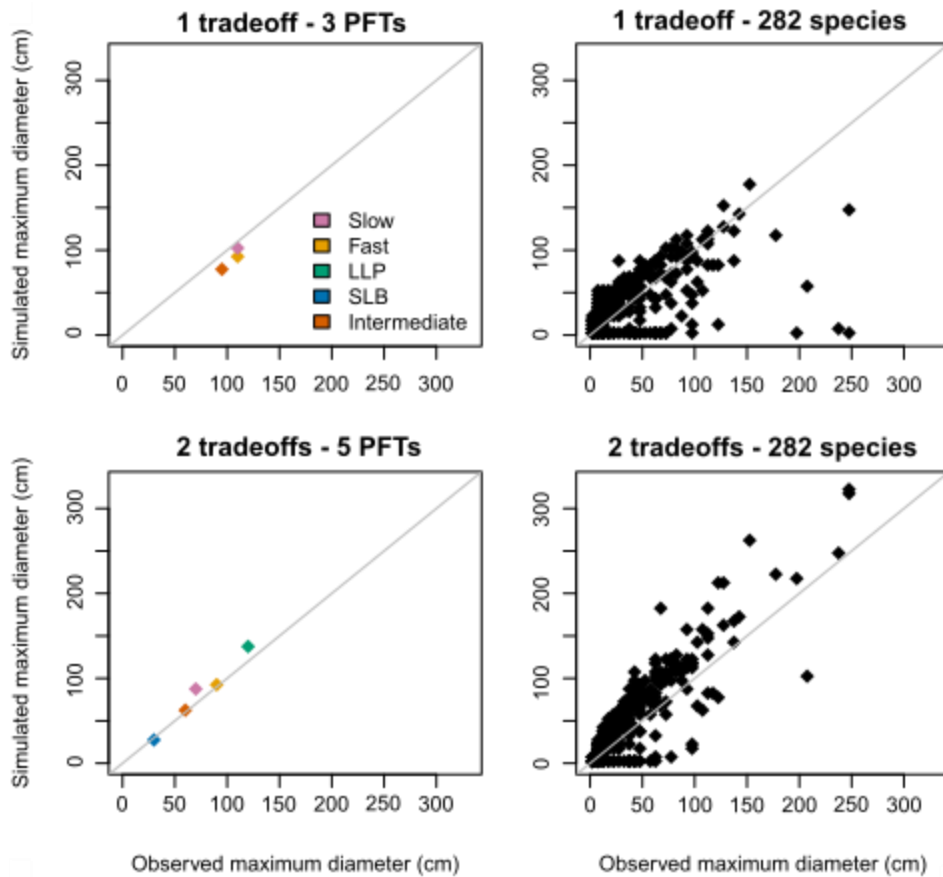

545

**Fig. S5.**

Simulated and observed maximum diameters of the PFTs or species for four model scenarios. 1:1 lines are shown in grey. See Suppl. for details.

550

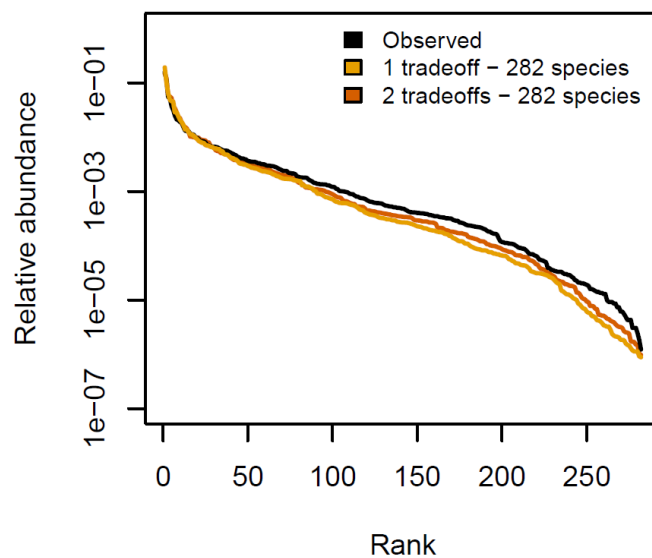

**Fig. S6.**

Observed and predicted rank-abundance curves after 100 years of simulation of old-growth forest at Barro Colorado Island, Panama.

555

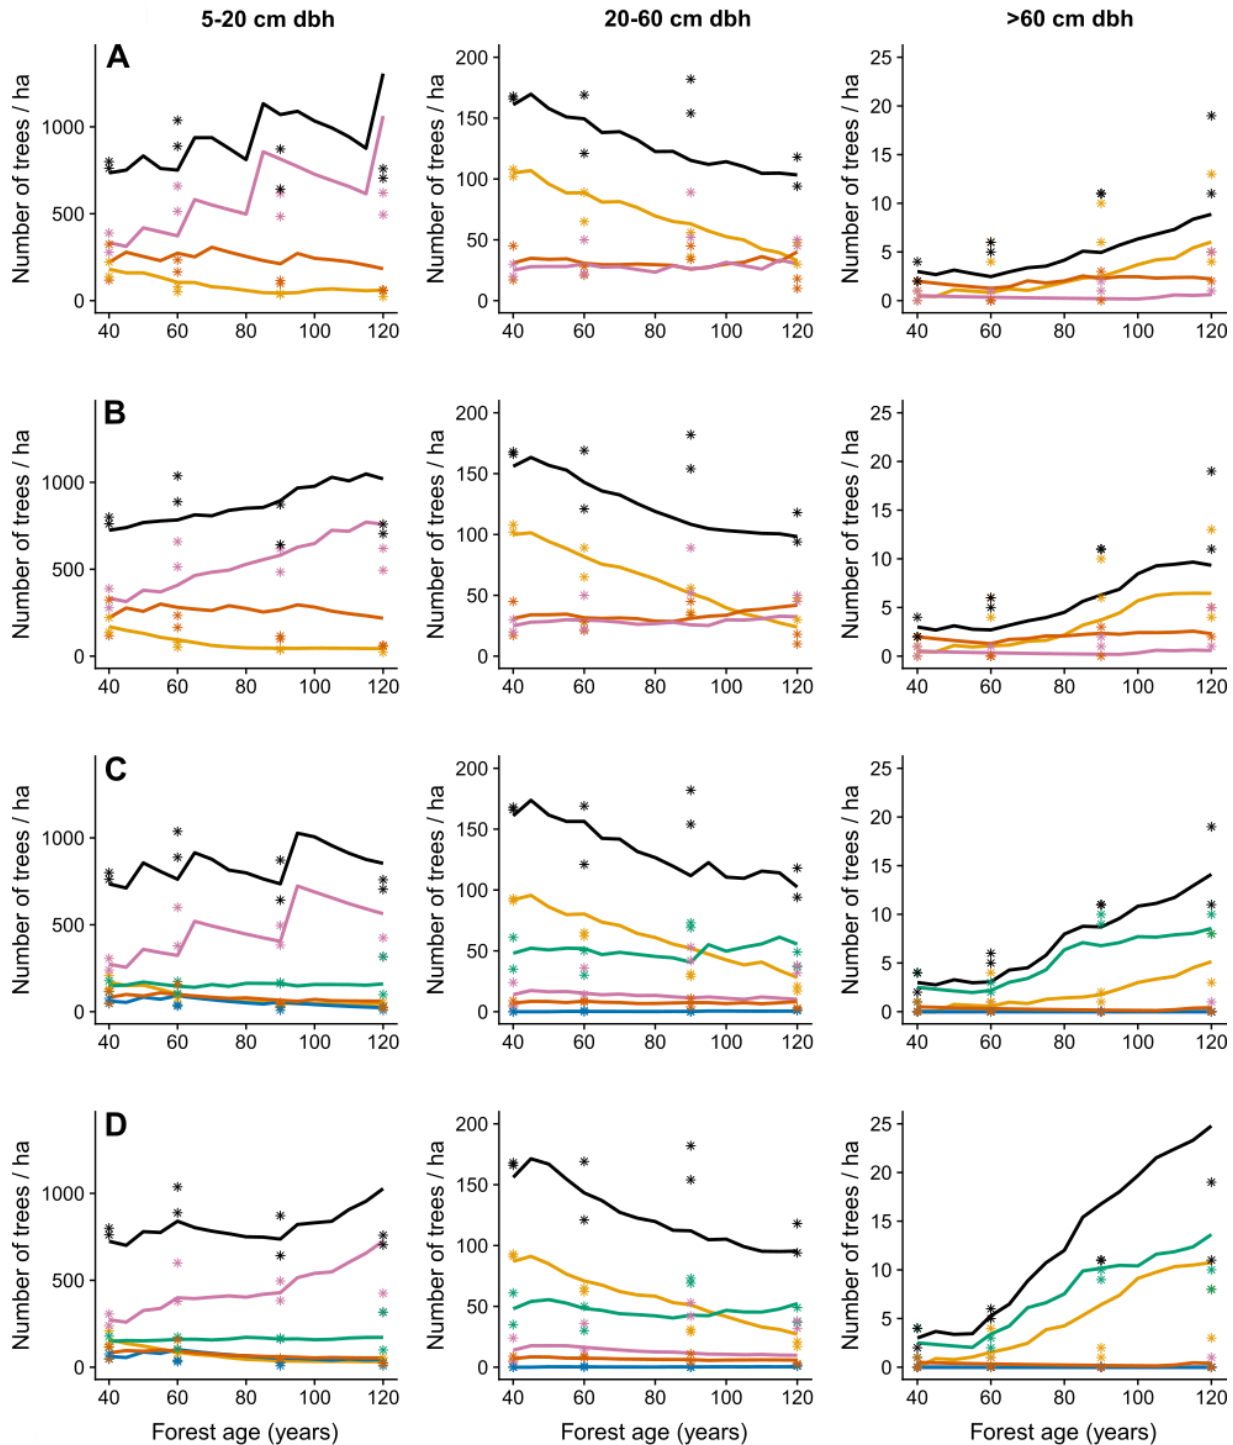

**Fig. S7.**

560 Predicted and observed abundance in four model scenarios (rows; A: 1 tradeoff – 3 PFTs, B: 1 tradeoff – 282 species, C: 2 tradeoffs – 5 PFTs, D: 2 tradeoffs – 282 species) and three size classes (columns). Simulated (lines) and observed (asterisks) abundance per PFT in secondary tropical forest in Barro Colorado Nature Monument National Park, Panama. Color code: purple – slow, yellow – fast, green – LLP, blue – SLB, red – intermediate, black – total.

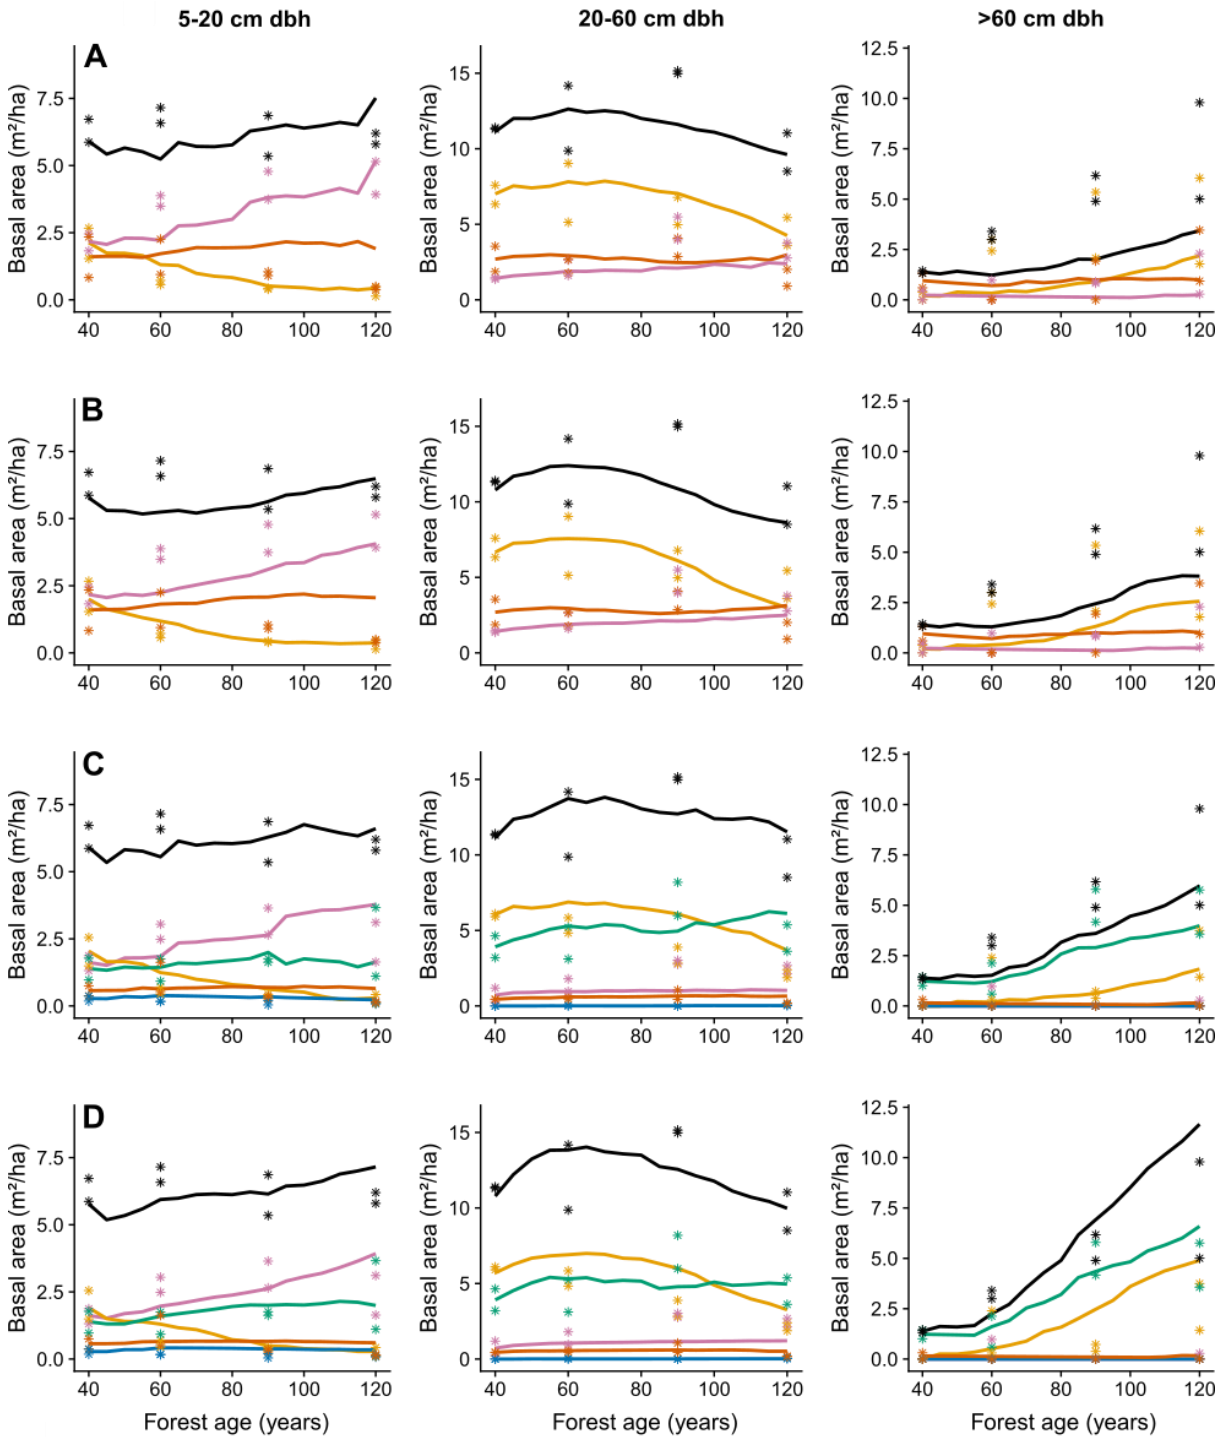

565 **Fig. S8.**

Predicted and observed basal area in four model scenarios (rows; A: 1 tradeoff – 3 PFTs, B: 1 tradeoff – 282 species, C: 2 tradeoffs – 5 PFTs, D: 2 tradeoffs – 282 species) and three size classes (columns). Simulated (lines) and observed (asterisks) basal area per PFT in secondary tropical forest in Barro Colorado Nature Monument National Park, Panama. Color code: purple – slow, yellow – fast, green – LLP, blue – SLB, red – intermediate, black – total.

570

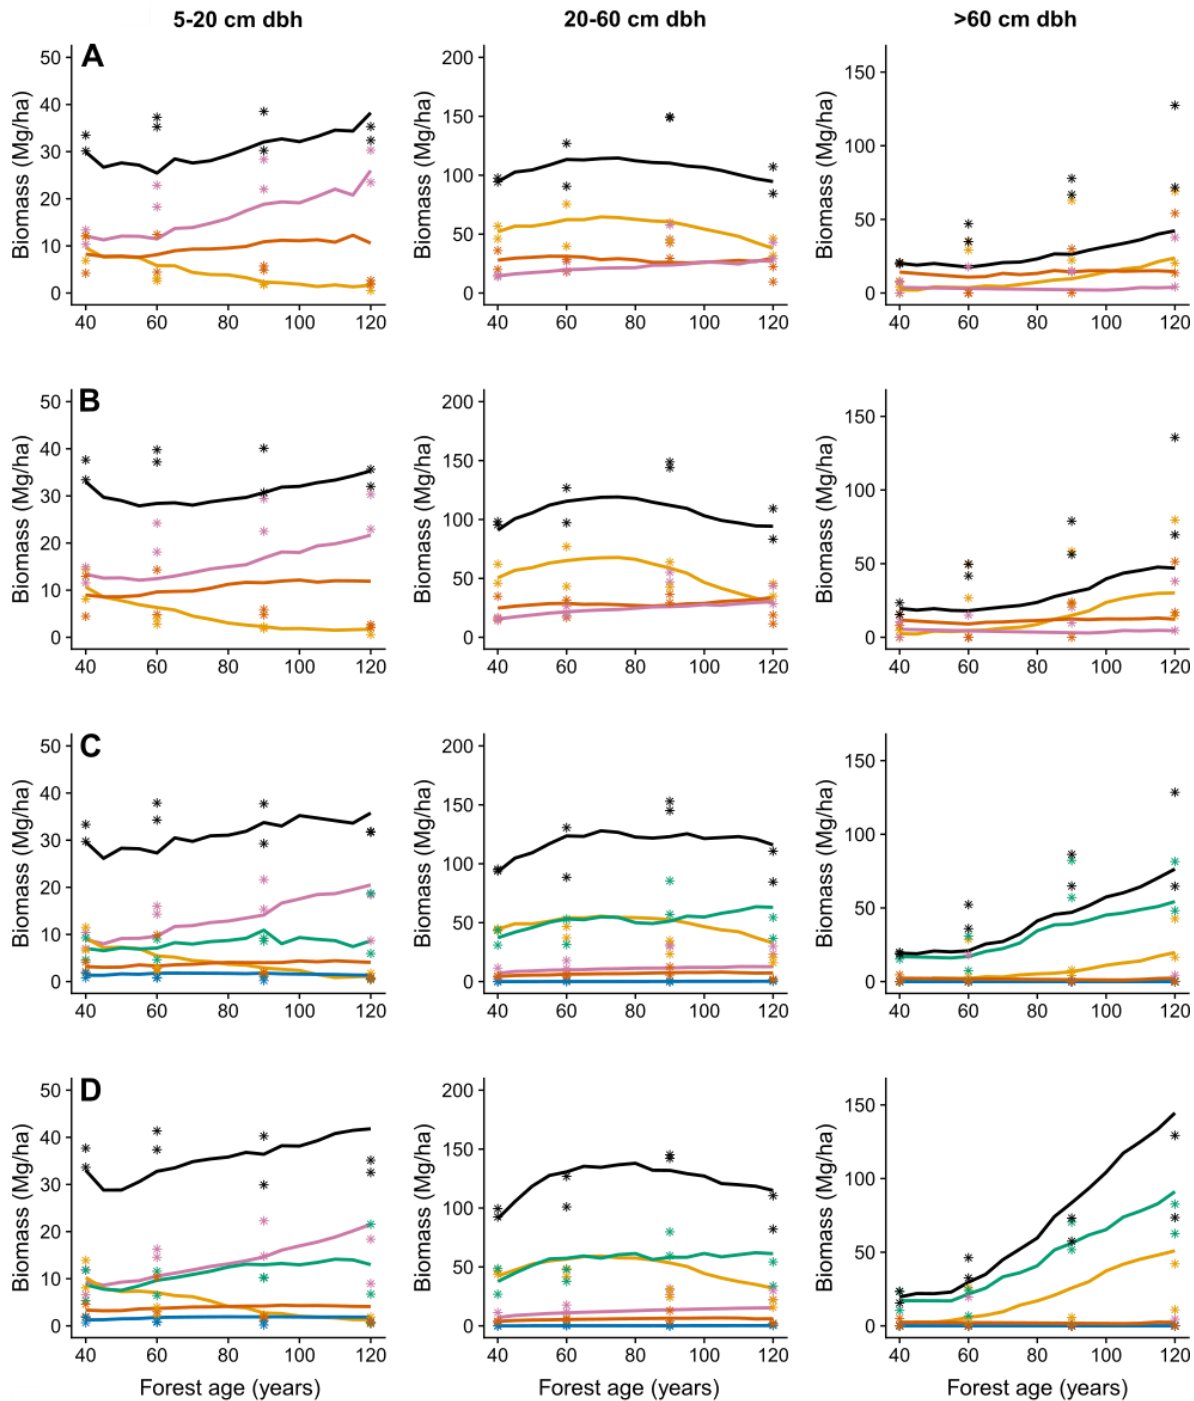

**Fig. S9.**

575 Predicted and observed above-ground biomass (AGB) area in four model scenarios (rows; A: 1 tradeoff – 3 PFTs, B: 1 tradeoff – 282 species, C: 2 tradeoffs – 5 PFTs, D: 2 tradeoffs – 282 species) and three size classes (columns). Simulated (lines) and observed (asterisks) biomass per PFT in secondary tropical forest in Barro Colorado Nature Monument National Park, Panama. Color code: purple – slow, yellow – fast, green – LLP, blue – SLB, red – intermediate, black – total.

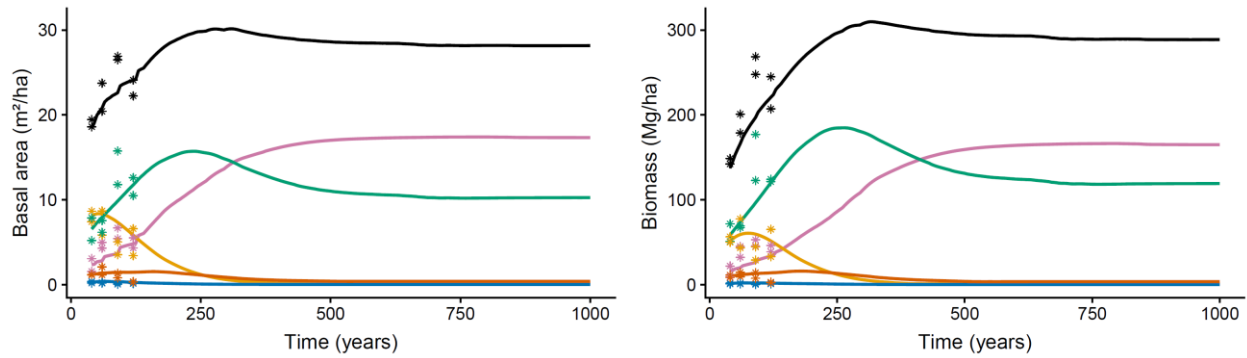

580

**Fig. S10.**

Simulated long-term succession of scenario 3 (2 tradeoffs, 5 PFTS) starting from inventory data of 40-year old secondary forest. Basal area and above-ground biomass of individuals  $\geq 5$  cm dbh for comparison with secondary forest data (asterisks). Recruitment rates of the PFTs are constant and set to annual averages of the number of observed recruits of species assigned to the five PFTs. Color code: purple – slow, yellow – fast, green – LLP, blue – SLB, red – intermediate, black – total.

585



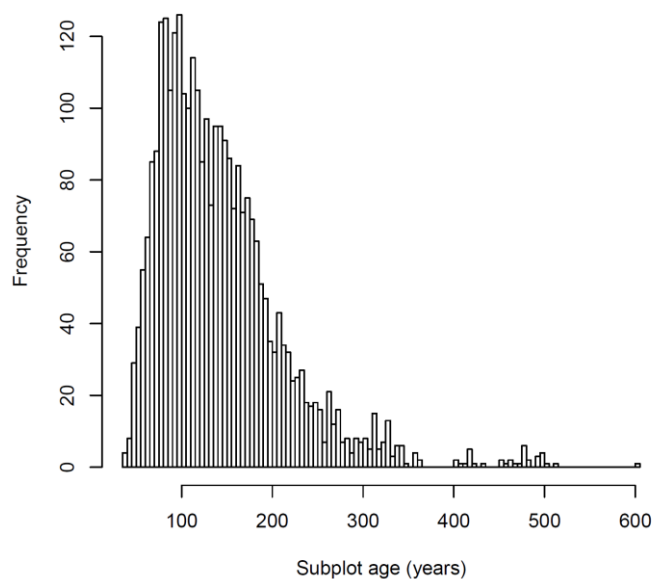

590 **Fig. S11.**  
Estimated age distribution of ~0.1-ha subplots from six censuses (1985, 1990, 1995, 2000, 2005, 2010).

**Table S1.**

595 Loadings of demographic parameters in the wPCA. Survival and growth of trees ( $\geq 1$  cm dbh) in four canopy layers is indicated by ‘Survival 1’ etc. Recruitment is the number of recruits per unit of total species basal area. Only the first one or two principal components are used to back-calculate model parameters from species scores in PCA space, depending on the scenario.

| Parameters  | Parameter loadings |         |         |         |         |        |         |         |         |
|-------------|--------------------|---------|---------|---------|---------|--------|---------|---------|---------|
|             | PC1                | PC2     | PC3     | PC4     | PC5     | PC6    | PC7     | PC8     | PC9     |
| Survival1   | 0.2103             | 0.2947  | -0.5398 | -0.4130 | -0.4612 | 0.3415 | -0.2380 | 0.1407  | -0.0356 |
| Survival2   | 0.3370             | 0.4051  | -0.0063 | -0.2672 | 0.3237  | 0.0814 | 0.7127  | -0.0482 | 0.1712  |
| Survival3   | 0.4376             | 0.2396  | 0.2830  | 0.2505  | 0.0200  | 0.1136 | -0.4280 | -0.1090 | 0.6323  |
| Survival4   | 0.4541             | 0.2032  | 0.2832  | 0.2428  | 0.1178  | 0.2067 | -0.1305 | 0.1782  | -0.7127 |
| Growth1     | -0.1943            | 0.2070  | -0.6090 | 0.5235  | 0.4575  | 0.2204 | -0.0746 | -0.1046 | -0.0014 |
| Growth2     | -0.3504            | 0.1586  | 0.2375  | -0.5400 | 0.5401  | 0.2434 | -0.3889 | 0.0320  | -0.0285 |
| Growth3     | -0.3899            | 0.3775  | 0.1968  | 0.2308  | -0.1839 | 0.0735 | 0.1434  | 0.7262  | 0.1622  |
| Growth4     | -0.3609            | 0.3588  | 0.2738  | 0.1188  | -0.3651 | 0.3276 | 0.1296  | -0.6163 | -0.1215 |
| Recruitment | 0.0415             | -0.5578 | 0.0858  | 0.0571  | 0.0069  | 0.7750 | 0.2025  | 0.1228  | 0.1404  |

600

### Table S2.

PPA model parameters for 3 PFTs (1 demographic tradeoff axis). G1 to G4 and mu1 to mu4 are annual growth (mm/y) and mortality (1/y) rates in four canopy layers, respectively. F is the number of new recruits over the 1 cm dbh threshold per year and hectare and wd is wood density (g/cm<sup>3</sup>).

605

| PFT          | Model parameters |         |         |         |         |         |         |         |       |       |
|--------------|------------------|---------|---------|---------|---------|---------|---------|---------|-------|-------|
|              | G1               | G2      | G3      | G4      | mu1     | mu2     | mu3     | mu4     | F     | wd    |
| slow         | 2.46028          | 0.68289 | 0.40415 | 0.36858 | 0.0174  | 0.0097  | 0.01037 | 0.01641 | 79.22 | 0.566 |
| fast         | 4.34277          | 2.21993 | 0.89384 | 0.67679 | 0.02851 | 0.02614 | 0.04981 | 0.06728 | 22.65 | 0.412 |
| intermediate | 3.2687           | 1.23125 | 0.60104 | 0.49945 | 0.02227 | 0.01592 | 0.02272 | 0.03323 | 12.62 | 0.620 |

**Table S3.**

610 PPA model parameters for 5 PFTs (2 demographic tradeoff axes). G1 to G4 and mu1 to mu4 are annual growth (mm/y) and mortality (1/y) rates in four canopy layers, respectively. F is the number of new recruits over the 1 cm dbh threshold per year and hectare and wd is wood density (g/cm<sup>3</sup>).

615

| PFT          | Model parameters |         |         |         |         |         |         |         |       |       |
|--------------|------------------|---------|---------|---------|---------|---------|---------|---------|-------|-------|
|              | G1               | G2      | G3      | G4      | mu1     | mu2     | mu3     | mu4     | F     | wd    |
| slow         | 2.46028          | 0.68289 | 0.40415 | 0.36858 | 0.0174  | 0.0097  | 0.01037 | 0.01641 | 65.37 | 0.635 |
| Fast         | 4.34277          | 2.21993 | 0.89384 | 0.67679 | 0.02851 | 0.02614 | 0.04981 | 0.06728 | 20.83 | 0.403 |
| LLP          | 4.42383          | 1.6079  | 0.88258 | 0.67557 | 0.01576 | 0.00877 | 0.01479 | 0.02423 | 6.22  | 0.480 |
| SLB          | 2.4152           | 0.94283 | 0.40931 | 0.36925 | 0.03148 | 0.0289  | 0.03492 | 0.04557 | 16.83 | 0.653 |
| intermediate | 3.2687           | 1.23125 | 0.60104 | 0.49945 | 0.02227 | 0.01592 | 0.02272 | 0.03323 | 6.24  | 0.600 |
